# Supplementary material for: Chest Pain in a Psychiatric Patient Due to Clozapine-Induced Myopericarditis
Source: Case Rep Cardiol. 2021 Dec 24;2021:6067652. doi: 10.1155/2021/6067652 (PMC8720013; doi:10.1155/2021/6067652)
Supplement: Supplementary Materials — Figure S1: Left ventricular function on presenting cardiac MRI. Four chamber (a) and axial cine stacks (b) obtained at presentation showed left ventricular ejection fraction of 45% by volumetric assessment with mild inferolateral hypokinesis and a trivial pericardial effusion. Figure S2: Follow-up transthoracic echocardiogram. One week after clozapine cessation and initiation of heart failure therapies, follow-up echocardiogram showed normalization of left ventricular function with no wall motion abnormalities on apical 4 chamber (a) and short axis (b) cines. [file 6067652.f1.zip]

Archive with 2 entries (2 files):
- Figure 2 CMR.mp4
- Figure 4 TTE.mp4
